# Supplementary material
Source: PubMed Central journal article supplement (PMC4279957)
Supplement: NIHMS599231-supplement-1.pdf [file NIHMS599231-supplement-1.pdf]

574 **Supplemental Table 1. List of GP83 9-mer peptides used for IFN- $\gamma$  ELISPOT.**

| Peptide Number | Sequence   | Peptide Number | Sequence   | Peptide Number | Sequence   | Peptide Number | Sequence  |
|----------------|------------|----------------|------------|----------------|------------|----------------|-----------|
| 1              | MERYVGLGT  | 41             | GNRAHV DRA | 81             | SHGETTVRK  | 121            | RRVSEEIFP |
| 2              | VGLGTTLHL  | 42             | HVDRLTVT   | 82             | TTVRKDEVL  | 122            | EEIFPSVLF |
| 3              | TTLHLALQV  | 43             | ALTVTVLLS  | 83             | KDEVLGIVH  | 123            | PSVLFYPWA |
| 4              | LALQVEGPF  | 44             | TVLLSVKPA  | 84             | LGIVHFFDN  | 124            | FYPWALSIP |
| 5              | VEGPFPGPHE | 45             | SVKPACMTH  | 85             | HFFDNDLLT  | 125            | ALSIPTGFC |
| 6              | FGPHETRFV  | 46             | ACMTHVDSL  | 86             | NDLLTFHRV  | 126            | PTGFCAIYH |
| 7              | ETRFVHFDA  | 47             | HVDSLTEIN  | 87             | TFHRVAGVI  | 127            | CAYIHYNVV |
| 8              | VHFDAFTV   | 48             | LTEINCSHE  | 88             | VAGVIDTCM  | 128            | HYNVACSS  |
| 9              | ATFTVP RTP | 49             | NCSHEDIQV  | 89             | IDTCMMGKQ  | 129            | VACSEHSS  |
| 10             | VPRTPSVVI  | 50             | EDIQVFKAE  | 90             | MMGKQFETR  | 130            | SEHSSGEVQ |
| 11             | PSVVIV AEE | 51             | VFKA EVFQK | 91             | QFETRVRR C | 131            | SGEVQDGSV |
| 12             | IVAE EQVGS | 52             | EVFQKGRPN  | 92             | RVRRCSESC  | 132            | QDGSVWFDG |
| 13             | EQVGS HLPP | 53             | KGRPNVLGL  | 93             | CSESCQEQV  | 133            | VWFDGVPTR |
| 14             | SHLPPSSPL  | 54             | NVLGLTLQT  | 94             | CQEQVFKS   | 134            | GVPTRPASR |
| 15             | PSSPLR MKF | 55             | LTLQTTAKP  | 95             | VFVKSGGRR  | 135            | RPASRACSR |
| 16             | LRMKFRAIH  | 56             | TTAKPPPKK  | 96             | SGGRRTGNA  | 136            | RACSRTRRD |
| 17             | FRAIHSQEE  | 57             | PPPKKLTLF  | 97             | RTGNADRHR  | 137            | RTRRDDDGG |
| 18             | HSQEELDLL  | 58             | KLTLFFQLL  | 98             | ADRRRRDRD  | 138            | DDDGGAGTS |
| 19             | ELDLLNLEV  | 59             | FFQLLASHA  | 99             | RRDRDGGDD  | 139            | GAGTSRRSH |
| 20             | LNLEVRNAS  | 60             | LASHAQVVM  | 100            | DGGDDDDDE  | 140            | SRRSHRGAQ |
| 21             | VRNASDQPL  | 61             | AQVVMRHNP  | 101            | DDDDENEDG  |                |           |
| 22             | SDQPLPAKS  | 62             | MRHNYPYPAL | 102            | ENEDGEEGE  |                |           |
| 23             | LPAKSFYDL  | 63             | PYPALQSHP  | 103            | GEEGEEDGE  |                |           |
| 24             | SFYDLNVVV  | 64             | LQSHPSNGF  | 104            | EEDGEEDVG  |                |           |
| 25             | LNVVVFALP  | 65             | PSNGFTIHC  | 105            | EEDVGDAKD  |                |           |
| 26             | VFALPLPRV  | 66             | FTIHC PGDI | 106            | GDAKDDGSE  |                |           |
| 27             | PLPRVHAAP  | 67             | CPGDIRLQS  | 107            | DDGSESSSE  |                |           |
| 28             | VHAAPLHIF  | 68             | IRLQSGQTY  | 108            | ESSSESELG  |                |           |
| 29             | PLHIFNSA   | 69             | SGQTYRLTL  | 109            | ESELGSGED  |                |           |
| 30             | FFNSALKPS  | 70             | YRLTLRNGF  | 110            | GSGEDNDGD  |                |           |
| 31             | ALKPSRETF  | 71             | LRNGFDSTS  | 111            | DNDGDDDDVF |                |           |
| 32             | SRETFPTCS  | 72             | FDSTSHAAL  | 112            | DDDVFE CER |                |           |
| 33             | FPTCSKTVV  | 73             | SHAALFFPA  | 113            | FECERPLAR  |                |           |
| 34             | SKTVVRRAC  | 74             | LFFPADFPN  | 114            | RPLAREDGA  |                |           |
| 35             | VRRACGAIW  | 75             | ADFPNADIS  | 115            | REDGASGSA  |                |           |
| 36             | CGAIWGVRT  | 76             | NADISGGQW  | 116            | ASGSAERGT  |                |           |
| 37             | WGVRTALSN  | 77             | SGGQWKARH  | 117            | AERGT LNES |                |           |
| 38             | TALSNMAWT  | 78             | WKARHNMDI  | 118            | TLNESEDPS  |                |           |
| 39             | NMAWTEG VG | 79             | HNMDIVIRS  | 119            | SEDPSLRPR  |                |           |
| 40             | TEGVGNRAH  | 80             | IVIRSHGET  | 120            | SLRPRRVSE  |                |           |

575 **Supplemental Table 2. Summary of peptide pools used for epitope mapping.** Peptide #84  
 576 was identified as a broadly reactive epitope after multiple animals responded to peptide pools 12  
 577 and 19 (highlighted in light gray). Peptide #84 (highlighted in dark gray) was the only peptide  
 578 shared by both pools.

579

580

581

582

583

| Pool  | I   | II  | III | IV  | V   | VI  | VII | VIII | IX  | X   | XI  | XII |
|-------|-----|-----|-----|-----|-----|-----|-----|------|-----|-----|-----|-----|
| XIII  | 1   | 2   | 3   | 4   | 5   | 6   | 7   | 8    | 9   | 10  | 11  | 12  |
| XIV   | 13  | 14  | 15  | 16  | 17  | 18  | 19  | 20   | 21  | 22  | 23  | 24  |
| XV    | 25  | 26  | 27  | 28  | 29  | 30  | 31  | 32   | 33  | 34  | 35  | 36  |
| XVI   | 37  | 38  | 39  | 40  | 41  | 42  | 43  | 44   | 45  | 46  | 47  | 48  |
| XVII  | 49  | 50  | 51  | 52  | 53  | 54  | 55  | 56   | 57  | 58  | 59  | 60  |
| XVIII | 61  | 62  | 63  | 64  | 65  | 66  | 67  | 68   | 69  | 70  | 71  | 72  |
| XIX   | 73  | 74  | 75  | 76  | 77  | 78  | 79  | 80   | 81  | 82  | 83  | 84  |
| XX    | 85  | 86  | 87  | 88  | 89  | 90  | 91  | 92   | 93  | 94  | 95  | 96  |
| XXI   | 97  | 98  | 99  | 100 | 101 | 102 | 103 | 104  | 105 | 106 | 107 | 108 |
| XXII  | 109 | 110 | 111 | 112 | 113 | 114 | 115 | 116  | 117 | 118 | 119 | 120 |
| XXIII | 121 | 122 | 123 | 124 | 125 | 126 | 127 | 128  | 129 | 130 | 131 | 132 |
| XXIV  | 133 | 134 | 135 | 136 | 137 | 138 | 139 | 140  |     |     |     |     |
